# Supplementary material for: Biological Inquiry: A New Course and Assessment Plan in Response to the Call to Transform Undergraduate Biology
Source: Atypon-hosted journal article supplement (doi:10.1187/cbe.11-02-0017), 2012-12-01
Supplement: combinedsupmats4.pdf [file combinedsupmats4.pdf]

Biological Inquiry Research Poster Grading Rubric.

| <i>Explanation of grading of performance</i>                                     | <i>Inadequate: Performance not acceptable (F)</i>                                    | <i>Below average: Performance not up to minimum standards but shows marginal grasp of concepts (D)</i>                                                                           | <i>Average to above average: Performance met all minimum standards (C)</i>                                                                                       | <i>Good to very good: Performance representative of good to noteworthy achievement (B).</i>                                                                                      | <i>Particularly strong to exemplary: Performance demonstrates that this team moved beyond expectations and came up with original ideas that provided unique insight (A).</i>           |
|----------------------------------------------------------------------------------|--------------------------------------------------------------------------------------|----------------------------------------------------------------------------------------------------------------------------------------------------------------------------------|------------------------------------------------------------------------------------------------------------------------------------------------------------------|----------------------------------------------------------------------------------------------------------------------------------------------------------------------------------|----------------------------------------------------------------------------------------------------------------------------------------------------------------------------------------|
| <i>Introduction</i>                                                              | Intro is not present, is incoherent, or is unrelated to experiment.                  | Intro disorganized, or lacks reference to relevant primary literature, or missing purpose/hypothesis.                                                                            | Background info too broad or too narrow, or weak/missing purpose or hypothesis, or lacks sophistication and/or may contain fallacies of logic.                   | The intro smoothly pulls reader into topic. It is well organized, flows from general to specific, and makes clear the purpose of experiment.                                     | Intro is uniquely well written and is crafted in such a way (e.g., relevant examples from 1° lit) as to educate the poster audience in a noteworthy and effective way.                 |
| <i>Appropriate use of primary literature; including Literature Cited section</i> | No 1° literature cited or it was plagiarized and/or citations missing or inadequate. | Attempts at paraphrasing border on plagiarism, or cited literature seems random and/or irrelevant to topic, and/or literature cited section inadequate and improperly formatted. | Use of reference literature perfunctory without clear context, and/or attribution inappropriate or misplaced, and/or literature cited section is inadequate.     | Background information used in context (esp. in intro and discussion). Citations are appropriate and correctly located within text, with literature cited in appropriate format. | Creative and effective use of 1° literature, which is cited appropriately. Paraphrasing of other works represents noteworthy grasp of referenced articles applied to poster's context. |
| <i>Methods</i>                                                                   | Methods absent or blatantly inaccurate.                                              | Reader would have a tough time knowing what happened in the experiment and/or the methods was a list of materials and steps (style of H.S. lab report)                           | Methods gave general view of experiment but were incomplete or imprecise (e.g., only described single team's work rather than combined work across all sections) | Clearly states how experiment was conducted, and how data were collected and analyzed.                                                                                           | Methods are sophisticated, clear, and concise, giving particularly good insight (perhaps with visual aids) into how the study was performed and how the data were analyzed.            |
| <i>Results</i>                                                                   | No results, no figures, or what is present is grossly inaccurate.                    | Results are misleading or un-interpretable for reader due to mistakes or omissions (e.g., no figure captions).                                                                   | Graphs/tables don't conform to minimum standards (e.g., contain raw data), or captions are incomplete, axes are misleading, or supporting text is inaccurate.    | Figures & tables provide useful information for discussion. Captions are complete and accurate (include N, p-value, etc.), and supporting text is informative.                   | Results demonstrate effort beyond the norm, e.g., evidence that authors worked extra hard to create visually appealing, clear, and concise figures and supporting text.                |

This work was supported with funding from NSF (DUE grant 0836851). For additional information about the above document, please contact Ellen Goldey (goldeyes@wofford.edu).

Biological Inquiry Research Poster Grading Rubric.

|                                                           |                                                                                                                                         |                                                                                                                                                                     |                                                                                                                                                                                                     |                                                                                                                                                                                 |                                                                                                                                                                                                                                                         |
|-----------------------------------------------------------|-----------------------------------------------------------------------------------------------------------------------------------------|---------------------------------------------------------------------------------------------------------------------------------------------------------------------|-----------------------------------------------------------------------------------------------------------------------------------------------------------------------------------------------------|---------------------------------------------------------------------------------------------------------------------------------------------------------------------------------|---------------------------------------------------------------------------------------------------------------------------------------------------------------------------------------------------------------------------------------------------------|
| <i>Discussion</i>                                         | Discussion is not present, is incoherent, or is unrelated to experiment.                                                                | Discussion makes little attempt to address the purpose of the experiment or relate results to prior work and/or misuse of terms suggests ignorance of key concepts. | Discussion attempts to address the purpose of the experiment and relate results to other works, but misuse of scientific terms and/or <i>lack of coherence with other sections</i> confuses reader. | Authors do an adequate job of relating their findings to the hypothesis/purpose and situating their findings relative to background literature.                                 | Communicates original synthesis of evidence in a way that is complex and free of logical fallacies. Future study recommendations are <i>specific</i> and reasonably follow from this study. Findings are discussed (i.e., so what?) in broader context. |
| <i>Overall unity of poster across sections</i>            | Sections vary widely in quality and accuracy, resulting in a confusing hodgepodge.                                                      | Poster lacks unity and coherence (sections appear to have been developed separately then thrown together).                                                          | Acceptable coherence across some sections, but some sections (hint: often the intro and discussion) still lack any relationship to each other.                                                      | Demonstrates generally coherent and unified writing across sections providing a unified whole.                                                                                  | Sections are well integrated and interdependent (e.g., topics of intro are resolved in discussion) with smooth transitions. Discussion reflects back on other sections to provide novel, even exciting, insights.                                       |
| <i>Title, authors, &amp; acknowledgements</i>             | Missing                                                                                                                                 | Any part missing or misleading.                                                                                                                                     | All present, but title is not descriptive of experiment.                                                                                                                                            | All present, title is descriptive and accurate.                                                                                                                                 | All present, title is descriptive yet brief (perhaps even creative).                                                                                                                                                                                    |
| <i>Sentence structure, grammar, punctuation, spelling</i> | Sentence structure seriously flawed, and/or numerous grammar and punctuation problems, and/or many spelling errors.                     | Several problems with sentence structure, spelling, grammar and punctuation make poster unprofessional.                                                             | Errors in grammar, punctuation, and/or spelling detract from quality. Vocabulary immature or misused. Text would benefit from additional editing!                                                   | A few errors in grammar, punctuation, or spelling do not detract too much from overall poster quality. Sentence structure is generally good, but may still contain waste words. | Poster is free of errors in grammar, punctuation, or spelling, and sentences are well structured. Poster demonstrates authors' careful editing. Vocabulary is notably sophisticated.                                                                    |
| <i>Creativity</i>                                         | Poster is visually unappealing; use of template not apparent, and/or extraneous clutter completely distracts from the poster's purpose. | Poster fails to meet minimal standards. Sections incomplete or obviously unbalanced in length and layout.                                                           | Poster meets minimal requirements (e.g., template used), but problems exist (e.g., overcrowding or reducing text size to squeeze in words) makes it less appealing.                                 | Authors have followed guidelines and added visual interest while preserving white space.                                                                                        | Authors have added creative (e.g., images, humor) touches that enhance their poster's effectiveness <u>without</u> <u>distracting</u> from the poster's purpose. Be careful here!                                                                       |

This work was supported with funding from NSF (DUE grant 0836851). For additional information about the above document, please contact Ellen Goldey (goldeyes@wofford.edu).
